# Supplementary material for: Multi-domain and complex protein structure prediction using inter-domain interactions from deep learning
Source: PubMed Central journal article supplement (PMC10692239; doi:10.1038/s42003-023-05610-7), 2023-12-01
Supplement: 42003_2023_5610_MOESM2_ESM.pdf [file 42003_2023_5610_MOESM2_ESM.pdf]

## **Description of Additional Supplementary Files**

**File name:** Supplementary Data 1

**Description:** The source data behind the Figures 2, 3, 8, 9 in the paper.

**File name:** Supplementary Data 2

**Description:** The source data behind the Figure 4 in the paper.

**File name:** Supplementary Data 3

**Description:** The source data behind the Supplementary Table 2 in the Supplementary Information.

**File name:** Supplementary Data 4

**Description:** The source data behind the Figures 5-6 in the paper.
